# Supplementary material for: Structural analysis of cellulose acetate and zirconium alkoxide hybrid fibres
Source: Royal Society of Chemistry journal article supplement (doi:10.1039/c6ra08974g), 2016-01-01
Supplement: c6ra08974g1.pdf [file c6ra08974g1.pdf]

Supporting Information for

**Structural Analysis of Cellulose Acetate and Zirconium  
Alkoxide Hybrid Fibres**

*Hanako Asai <sup>a\*</sup>, Hiroaki Nitani <sup>b</sup>, Fumihiro Nishimura <sup>c</sup>, Susumu Yonezawa <sup>c</sup> and Koji Nakane <sup>a</sup>*

a) Frontier Fibre Technology and Science, Graduate School of Engineering, University of Fukui, 3-9-1 Bunkyo, Fukui, 910-8507, Japan

b) Institute of Materials Structure Science, High Energy Accelerator Research Organization (KEK), 1-1 Oho, Tsukuba, Ibaraki 305-0801, Japan

c) Headquarters for Innovative Society-Academia Cooperation, University of Fukui, 3-9-1 Bunkyo, Fukui, 910-8507, Japan

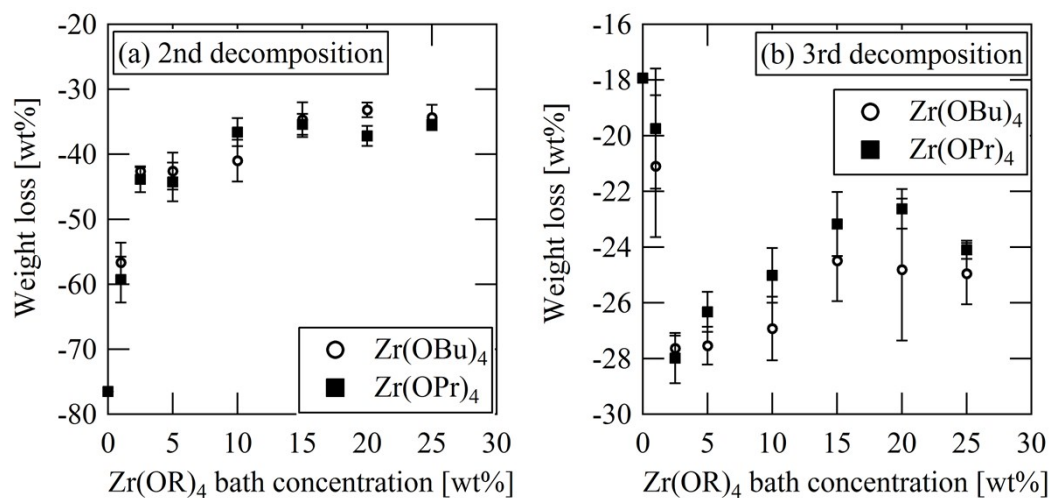

**Fig. S1** Variation of the weight loss at (a) 2nd decomposition stage and (b) 3rd decomposition stage as a function of the Zr(OR)<sub>4</sub> bath concentration.

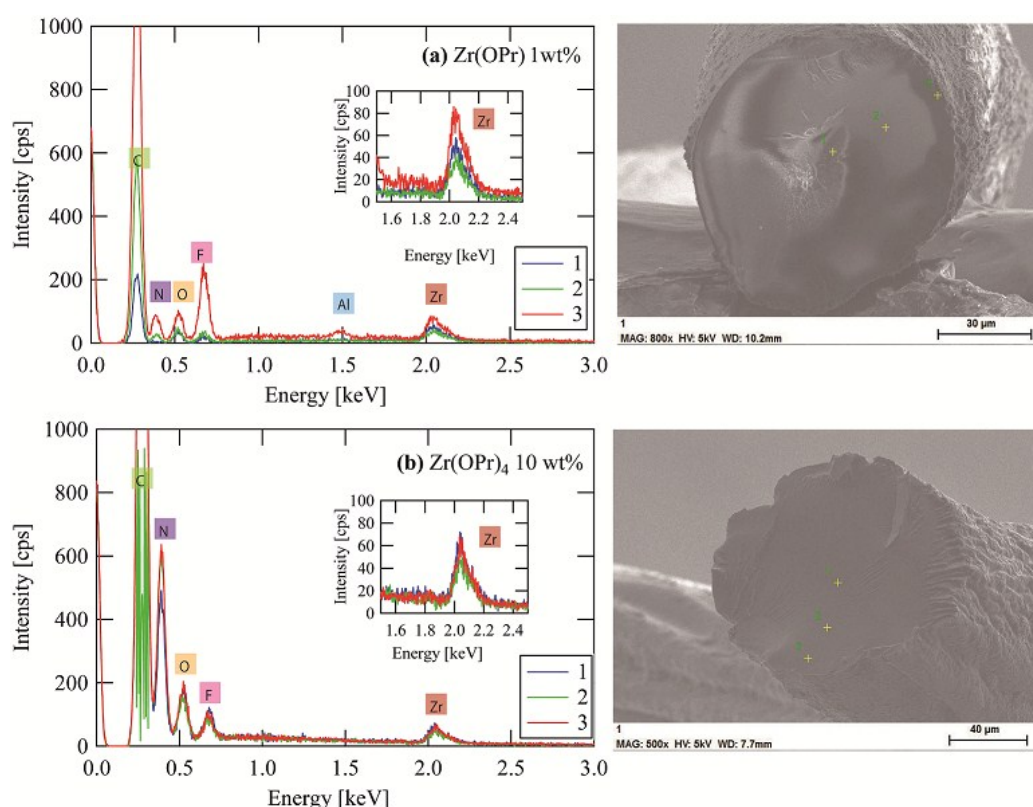

**Fig. S2** Point analyses of EDS for the CA-Zr fibre samples. The analyses were performed at 3 points, indicated by yellow crosses in the right photographs; Point 1 was the centre of the fibre, point 3 was the surface of the fibre, and point 2 was intermediate between the two points. The F and N came from the ionic liquid, and Al might come from the sample holder of EDS. As shown in the magnified plot (inset) of the 1 wt% result, there was more Zr at point 3 than at the other points, while the same Zr amounts were observed for the 10 wt% sample.
